# Supplementary material for: Hyaluronic acid modified doxorubicin loaded Fe3O4 nanoparticles effectively inhibit breast cancer metastasis
Source: Royal Society of Chemistry journal article supplement (doi:10.1039/c9tb01250h), 2019-01-01
Supplement: c9tb01250h1.pdf [file c9tb01250h1.pdf]

## Supporting Information

### **Hyaluronic acid modified doxorubicin loaded Fe<sub>3</sub>O<sub>4</sub> nanoparticles effectively inhibit breast cancer metastasis**

Ting Gong, Zhanglu Dong, Yao Fu, Tao Gong, Li Deng\*, Zhirong Zhang

*Key Laboratory of Drug-Targeting and Drug Delivery System of the Education Ministry, Sichuan Engineering Laboratory for Plant-Sourced Drug and Sichuan Research Center for Drug Precision Industrial Technology, West China School of Pharmacy, Sichuan University, Chengdu, 610064, P. R. China.*

**\*Corresponding Author:**

**Li Deng, PhD**

West China School of Pharmacy, Sichuan University

No.17, Block 3, Southern Renmin Road, Chengdu, 610041, China

**Email:** [denglisunny@163.com](mailto:denglisunny@163.com)

## Figures

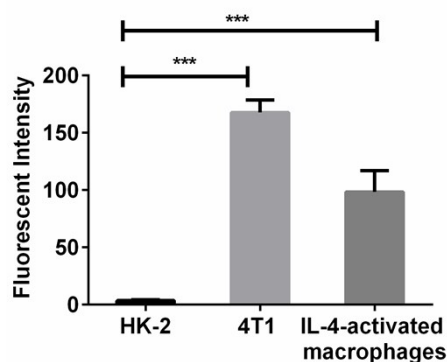

**Fig. S1.** The results of CD44 receptor expression in 4T1 cells and IL-4 activated macrophages we used in this study tested via flow cytometry with HK-2 cells as a negative control. Data represent mean  $\pm$  SD (n = 5), \*\*\*,  $p < 0.001$ .

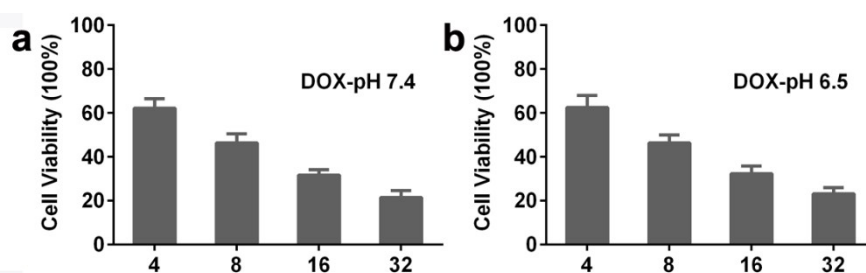

**Fig. S2.** *In vitro* cell viability of free DOX against TAMs at pH 7.4 (a) and pH 6.5 (b).

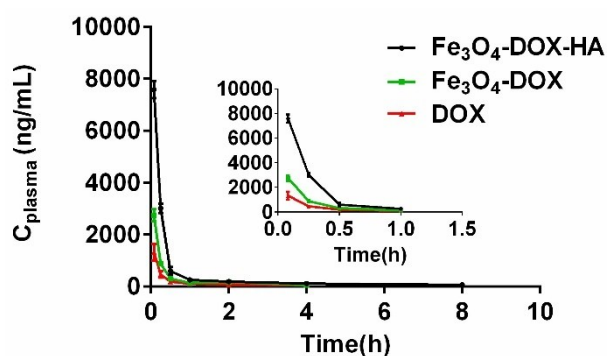

**Fig. S3.** *In vivo* pharmacokinetic profiles after intravenous injection of free DOX, Fe<sub>3</sub>O<sub>4</sub>-DOX-HA and Fe<sub>3</sub>O<sub>4</sub>-DOX in rats. Data represent mean  $\pm$  SD (n = 5).

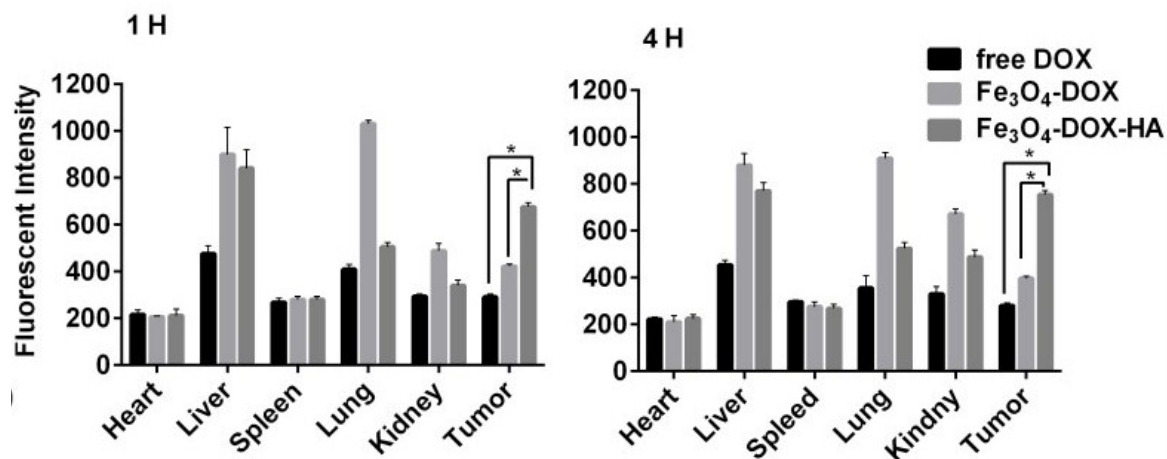

**Fig. S4.** The fluorescence intensity of DOX in tumors and vital organs in all the three groups at 1 and 4 h after administration. Data represent mean  $\pm$  SD (n = 5), \*,  $p < 0.05$ .

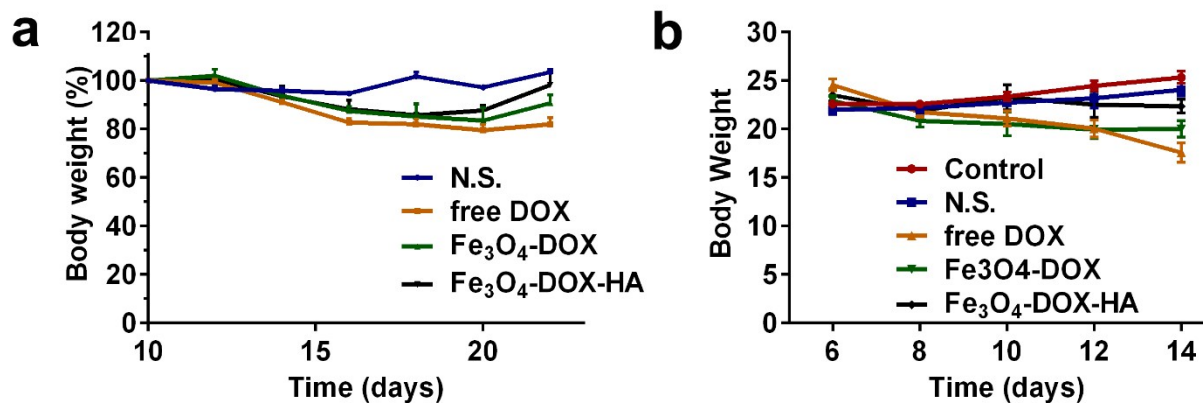

**Fig. S5.** Body weight in tumor-bearing female BALB/c mice were recorded in *in vivo* antitumor (a) and anti-metastasis study (b).

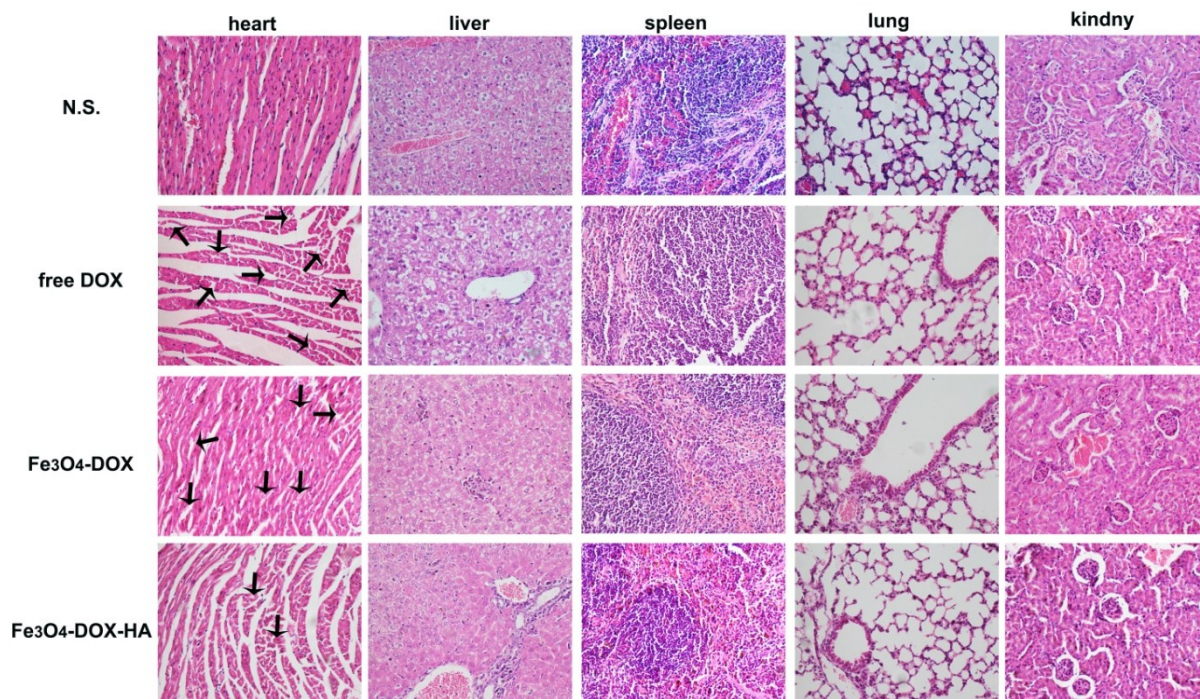

**Fig. S6.** Safety evaluation of free DOX, Fe<sub>3</sub>O<sub>4</sub>-DOX and Fe<sub>3</sub>O<sub>4</sub>-DOX-HA, magnification: 200×.

## Tables

**Table S1.** Pharmacokinetic parameters of free DOX, Fe<sub>3</sub>O<sub>4</sub>-DOX and Fe<sub>3</sub>O<sub>4</sub>-DOX-HA ( mean ± SD, n = 5).

| Sample                           | Free DOX       | Fe <sub>3</sub> O <sub>4</sub> -DOX | Fe <sub>3</sub> O <sub>4</sub> -DOX+HA |
|----------------------------------|----------------|-------------------------------------|----------------------------------------|
| Dose (mg/kg)                     | 2.0            | 2.0                                 | 2.0                                    |
| C <sub>max</sub> (ng/ml)         | 1476.5 ± 325.6 | 2974.6 ± 218.5                      | 7197.3 ± 293.1 <sup>a, b</sup>         |
| T <sub>max</sub> (min)           | 5              | 5                                   | 5                                      |
| AUC <sub>(0-t)</sub> (min·ng/ml) | 36,982         | 80,655                              | 193,867 <sup>a, b</sup>                |
| t <sub>1/2</sub> (min)           | 27.58          | 85.32                               | 184.96 <sup>a, b</sup>                 |

<sup>a</sup>,  $p < 0.01$  vs. Fe<sub>3</sub>O<sub>4</sub>-DOX group.

<sup>b</sup>,  $p < 0.001$  vs. free DOX group.

**Table. S2.** Median survival and ILS of mice bearing 4T1 tumors treated with saline and various DOX formulations (n = 10).

| Groups                                 | Median (days) | ILS (%)                                |
|----------------------------------------|---------------|----------------------------------------|
|                                        |               | Fe <sub>3</sub> O <sub>4</sub> -DOX+HA |
| N.S.                                   | 36            | 38.9***                                |
| DOX                                    | 36            | 38.9***                                |
| Fe <sub>3</sub> O <sub>4</sub> -DOX    | 40            | 25*                                    |
| Fe <sub>3</sub> O <sub>4</sub> -DOX-HA | 50            | /                                      |

Median: the median survival.

ILS (increase in life span) =  $(T/C - 1) \times 100\%$ , where T and C represent the mean survival time (days) of the treated and control animals, respectively. p values: were calculated by using the log-rank (Mantel-Cox) test, \*,  $p < 0.05$ , \*\*\*,  $p < 0.01$ .
